# Supplementary material for: Self-Reported Cannabis Use Is Associated With a Lower Rate of Persistent Opioid Use After Total Joint Arthroplasty
Source: PubMed Central journal article supplement — Arthroplast Today. 2022 Sep 19;17:145–9. doi: 10.1016/j.artd.2022.07.014 (PMC9493281; doi:10.1016/j.artd.2022.07.014), 2022-09-19
Supplement: mmc2.pdf [file mmc2.pdf]

# INDIVIDUAL CONFLICT OF INTEREST STATEMENT

## *American Association of Hip and Knee Surgeons*

(Adopted from the American Academy of Orthopaedic Surgeons disclosure statement)

The following form **must be filled out completely and submitted by each author (example, 6 authors, 6 forms).**  
**All items require a response. If there is no relevant disclosure for a given item, enter "None."**

---

**Manuscript Title: Perioperative Cannabis Use Decreases Persistent Opioid Use After Total Joint Arthroplasty**

1. Royalties from a company or supplier (The following conflicts were disclosed)  
DePuy, A Johnson & Johnson Company;
2. Speakers bureau/paid presentations for a company or supplier (The following conflicts were disclosed)  
DePuy, A Johnson & Johnson Company
- 3A. Paid employee for a company or supplier (The following conflicts were disclosed)  
None
- 3B. Paid consultant for a company or supplier (The following conflicts were disclosed)  
Corin USA; DePuy, A Johnson & Johnson Company
- 3C. Unpaid consultants for a company or supplier (The following conflicts were disclosed)  
None
4. Stock or stock options in a company or supplier (The following conflicts were disclosed)  
Joint Vue
5. Research support from a company or supplier as a Principal Investigator (The following conflicts were disclosed)  
DePuy, A Johnson & Johnson Company; Porter Adventist Hospital
6. Other financial or material support from a company or supplier (The following conflicts were disclosed)  
None
7. Royalties, financial or material support from publishers (The following conflicts were disclosed)  
Wolters Kluwer Health – Lippincott Williams & Wilkins
8. Medical/Orthopaedic publications editorial/governing board (The following conflicts were disclosed)  
Clinical Orthopaedics and Related Research; Journal of Arthroplasty; Journal of Bone and Joint Surgery;  
Orthopedics Today
9. Board member/committee appointments for a society (The following conflicts were disclosed)  
None

**Each author must sign AND print or type his/her name, date and submit a separate form**

In addition, one BLINDED Conflict of Interest form (no author names used) should be submitted per manuscript with all author disclosures.

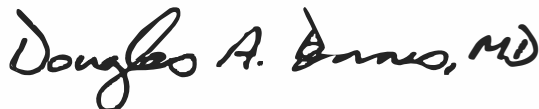

2/25/2022

Douglas Dennis

Author Name (Print or Type)

Author Signature

Date
